# Supplementary material
Source: PubMed Central journal article supplement (PMC2904850)
Supplement: NIHMS208926-supplement-02.pdf [file NIHMS208926-supplement-02.pdf]

Supplementary Table 1. Plasmid construction.

| Plasmid | Insert                                                      | Construction                                                                                                                                                                                                                                                              |
|---------|-------------------------------------------------------------|---------------------------------------------------------------------------------------------------------------------------------------------------------------------------------------------------------------------------------------------------------------------------|
| pAF022  | $P_{spoIID}$ -yfp at <i>pyrD</i>                            | $P_{spoIID}$ fragment (PY79; AFO063, 064) was digested with EcoRI & HindIII and ligated to pKM51.                                                                                                                                                                         |
| pAF038  | $P_{spank}$ - $P_{spoVE}$ - <i>spoVE-gfp</i> at <i>amyE</i> | $P_{spoVE}$ - <i>spoVE-gfp</i> amplified (JDB1135; AFO100, 102) was digested with NheI & SphI and ligated to pDR111(D. Rudner).                                                                                                                                           |
| pAF054  | $P_{spoIIQ}$ -yfp at <i>sacA</i>                            | $P_{spoIIQ}$ amplified (PY79; AFO126, 127) was digested with EcoRI/HindIII and ligated to pDG1662(2) cut with same. YFP cassette was digested with HindIII/BamHI and ligated to vector. $P_{spoIIQ}$ -YFP was then digested with EcoRI/BamHI and ligated to pSac-Kan (6). |
| pAF078  | <i>ftsW</i> -yfp                                            | <i>ftsW</i> amplified (PY79, AFO154, 155) was digested with EcoRI/XhoI and ligated to pKM67                                                                                                                                                                               |
| pAF083  | <i>tet</i> cassette at <i>sacA</i>                          | <i>tet</i> cassette amplified (pDG1515(3), AFO081, 082) was digested with EcoRI/SphI and ligated to pSac-Cm (6).                                                                                                                                                          |
| pAF100  | <i>spoVD-flag</i>                                           | 3' <i>spoVD</i> -flag amplified (PY79, JDO763, AFO238), digested with EcoRI and SphI, ligated to pKL147(5).                                                                                                                                                               |
| pAF104  | $P_{spoIID}$ - <i>cfp</i> at <i>sacA</i>                    | $P_{spoIID}$ amplified (PY79; AFO063, 064) was digested with EcoRI/HindIII and ligated to pAF083. CFP cassette was then digested with HindIII/BamHI and ligated to vector.                                                                                                |
| pAF132  | addition of SpeI site                                       | pDG1662(2) fragment amplified (AFO326, 327) digested with EcoRI/SphI and ligated to pDG1662(2).                                                                                                                                                                           |
| pAF195  | <i>mls</i> at <i>sacA</i>                                   | Mls cassette amplified (pDG1730(2); AFO458, 459), digested with EcoRI and SphI, ligated to pSac-Cm (6).                                                                                                                                                                   |
| pAF211  | $P_{spoVE}$ - <i>spoVE(G334A)</i> at <i>amyE</i>            | $P_{spoVE}$ - <i>spoVE(G334A)</i> amplified (JDB1271, OJD006, AFO363) was digested with EcoRI/BamHI and ligated to pAF195                                                                                                                                                 |
| pAF213  | $P_{spoVE}$ - <i>spoVE(G343A)</i> at <i>amyE</i>            | $P_{spoVE}$ - <i>spoVE(G343A)</i> amplified (JDB1355; OJD006, AFO363) was digested with EcoRI/BamHI and ligated to pAF195.                                                                                                                                                |
| pAF215  | $P_{spoVE}$ - <i>spoVE(E271A)</i> at <i>amyE</i>            | $P_{spoVE}$ - <i>spoVE(E271A)</i> amplified (JDB1359; OJD006, AFO363) was digested with EcoRI/BamHI and ligated to pAF195.                                                                                                                                                |
| pAF216  | $P_{spoVE}$ - <i>spoVE(W69A)</i> at <i>amyE</i>             | $P_{spoVE}$ - <i>spoVE(W69A)</i> amplified (JDB1850; OJD006, AFO363) was digested with EcoRI/BamHI and ligated to pAF195                                                                                                                                                  |
| pAF239  | $P_{spoVE}$ - <i>secY(1,6)-flag</i> at <i>amyE</i>          | <i>secY</i> amplified (MG1655; AFO482, 509) digested with SpeI and BamHI, and ligated to pKM44                                                                                                                                                                            |
| pAF248  | $P_{spoVE}$ - <i>spoVE</i> at <i>amyE</i>                   | $P_{spoVE}$ - <i>spoVE</i> amplified (PY79; OJD006, AFO524) and digested with EcoRI/BamHI and ligated to                                                                                                                                                                  |

|        |                                                                                 |                                                                                                                                                     |
|--------|---------------------------------------------------------------------------------|-----------------------------------------------------------------------------------------------------------------------------------------------------|
|        |                                                                                 | pDG1662                                                                                                                                             |
| pAF250 | $P_{spoVE}$ - <i>secY(1,6)</i> -flag at <i>sacA</i>                             | Fragment of pAF239 cut with EcoRI and BamHI ligated to pAF195                                                                                       |
| pAF254 | $P_{spoVE}$ - <i>spoVE</i> -GSGSGS- <i>spoVD</i> -flag at <i>amyE</i>           | Linker- <i>spoVD</i> -flag amplified (PY79; AFO532, 536) digested with SpeI/BamHI and ligated to pAF248.                                            |
| pAF257 | GSGSGS- <i>spoVD</i> -flag at <i>amyE</i>                                       | linker- <i>spoVD</i> -flag amplified (PY79; AFO532, 536), digested with SpeI/BamHI and ligated to pAF248.                                           |
| pAF260 | $P_{spoVE}$ - <i>spoVE</i> (G334A)-GSGSGS- <i>spoVD</i> -flag at <i>amyE</i>    | $P_{spoVE}$ - <i>spoVE</i> (G334A) amplified (JDB1271; OJD006, AFO524) was digested with EcoRI/SpeI and ligated to pAF257                           |
| pAF261 | $P_{spoVE}$ - <i>spoVE</i> (G343A)-GSGSGS- <i>spoVD</i> -flag cm at <i>amyE</i> | $P_{spoVE}$ - <i>spoVE</i> (G343A) amplified (JDB1355; OJD006, AFO524) digested with EcoRI/SpeI and ligated to pAF257                               |
| pAF263 | $P_{spoVE}$ - <i>spoVE</i> (E271A)-GSGSGS- <i>spoVD</i> -flag at <i>amyE</i>    | $P_{spoVE}$ - <i>spoVE</i> (E271A) amplified (JDB1357; OJD006, AFO524) was digested with EcoRI/SpeI and ligated to pAF257                           |
| pAF273 | $P_{spoVE}$ - <i>gfp</i> - <i>spoVD</i> (K496)-flag at <i>amyE</i>              | Fragments amplified with (pKM61; OJD006, AFO553-r) and (pKM61; AFO553, 536) were sewn together, digested with EcoRI/BamHI and ligated to pDG1662(4) |
| pAF274 | $P_{ftsW}$ - <i>ftsW</i> at <i>amyE</i>                                         | $P_{ftsW}$ - <i>ftsW</i> amplified (PY79; OJD199, AFO557), digested with EcoRI/BamHI and ligated to pDG1662(4)                                      |
| pAF275 | $P_{spoVE}$ - <i>spoVE</i> -GSGSGS- <i>pbpB</i> -flag at <i>amyE</i>            | <i>pbpB</i> amplified (PY79; AFO555, 556), digested with SpeI/BamHI and ligated to pAF248                                                           |
| pAF276 | $P_{ftsW}$ - <i>ftsW</i> -GSGSGS- <i>pbpB</i> -flag at <i>amyE</i>              | <i>pbpB</i> amplified (PY79; AFO555, 556), digested with SpeI/BamHI and ligated to pAF274                                                           |
| pAF278 | $P_{spoVE}$ - <i>spoVE</i> -GSGSGS- <i>spoVD</i> (K496A)-flag at <i>amyE</i>    | <i>spoVD</i> (K496A) amplified (pAF273; AFO532, 536) digested with SpeI/BamHI and ligated to pAF248.                                                |
| pAF310 | $P_{spoVE}$ - <i>spoVE</i> -GSGSGS- <i>spoVD</i> (Q227E)-flag at <i>amyE</i>    | <i>spoVD</i> (Q227E) amplified (pAF317; AFO532, 536) was digested with SpeI/BamHI and ligated to pAF248                                             |
| pAF317 | $P_{spoVE}$ - <i>gfp</i> - <i>spoVD</i> (Q227E) flag at <i>amyE</i>             | Fragments (pKM61; OJD006, AFO593-r; AFO593, 536) sewn together, digested with EcoRI/BamHI and ligated to pDG1662(4)                                 |
| pAF328 | 3' <i>spoVD</i> -mCherry                                                        | mCherry amplified (ODJ184, 185) was digested with XhoI/SphI and ligated to pKM5                                                                     |
| pAF402 | 3' <i>spoVD</i> (K496A)-mCherry                                                 | 3' <i>spoVD</i> amplified (pAF273; OJD763, OJD764) was digested with EcoRI/XhoI and ligated to pAF328 cut with same                                 |
| pKM5   | 3' <i>spoVD</i> - <i>gfp</i>                                                    | 3' <i>spoVD</i> amplified (PY79; OJD763, OJD764) was digested with EcoRI/XhoI and ligated to pKL147(5)                                              |
| pKM51  | <i>yfp</i> at <i>pyrD</i>                                                       | <i>yfp</i> amplified ( <i>yfp</i> cassette; JD643, 666) was digested with HindIII/BamHI and ligated to pPyr-Cm(6)                                   |
| pKM57  | $P_{spoVE}$ - <i>gfp</i> at <i>amyE</i>                                         | <i>yfp</i> amplified ( <i>yfp</i> cassette; OJD087, 088) was                                                                                        |

|       |                                               |                                                                                                               |
|-------|-----------------------------------------------|---------------------------------------------------------------------------------------------------------------|
|       |                                               | digested with HindIII/BamHI and ligated to pKM44                                                              |
| pKM61 | $P_{spoVE}$ - <i>gfp-spoVD</i> at <i>amyE</i> | <i>spoVD</i> amplified (PY79; OJD098, 099) was digested with SpeI and ligated to pKM57.                       |
| pKM65 | <i>cfp</i>                                    | <i>cfp</i> amplified ( <i>cfp</i> cassette; OJD152, 153) was digested with XhoI/SphI and ligated to pKL147(5) |
| pKM67 | <i>yfp</i>                                    | <i>yfp</i> amplified ( <i>yfp</i> cassette; OJD154, 155) was digested with XhoI/SphI and ligated to pKL147(5) |
| pKM77 | $P_{spoVE}$ - <i>yfp</i> at <i>amyE</i>       | <i>yfp</i> amplified ( <i>yfp</i> cassette; OJD087,088) digested with HindIII/BamHI and ligated to pKM44 (8)  |
| pKM80 | $P_{spoVE}$ - <i>yfp-spoVD</i> at <i>amyE</i> | <i>spoVD</i> amplified (PY79; OJD098, 099) was digested with SpeI and ligated to pKM77                        |
| pMR14 | $P_{spoVE}$ - <i>yfp-spoVD</i> at <i>gltA</i> | pKM80 digested with EcoRI/BamHI and $P_{spoVE}$ - <i>yfp-spoVD</i> fragment ligated to pGlt-Cm(6)             |
| pMR9  | $P_{spoVE}$ - <i>spoVE-cfp</i> at <i>sacA</i> | $P_{spoVE}$ - <i>spoVE-cfp</i> (JDB1376, OJD006, JD643) digests with EcoRI/BamHI and ligated to pSac-tet      |
| pMR12 | $P_{spoVE}$ - <i>ftsW-yfp</i> at <i>amyE</i>  | <i>ftsW-yfp</i> (JDB1559, AFO054 JD643) digested with SpeI/BamHI and ligated to pKM44(8) cut with same        |
| pMR14 | $P_{spoVE}$ - <i>yfp-spoVD</i> at <i>gltA</i> | pKM80 digested with EcoRI/BamHI and $P_{spoVE}$ - <i>yfp-spoVD</i> fragment ligated to pGlt-Cm(6)             |
| pMR35 | $P_{spoVE}$ - <i>yfp-cfp</i> at <i>amyE</i>   | <i>Cfp</i> amplified (OPM100, OPM101) digested with SpeI and ligated to pKM77 cut with NheI                   |

**For *E.coli* replication**

|        |                                      |                                                                                                                                       |
|--------|--------------------------------------|---------------------------------------------------------------------------------------------------------------------------------------|
| pAF172 | $P_{ara}$ -GST                       | RBS-GST-Xa cut from pALEX(7) with XbaI/SalI was ligated to to pBAD24(4) cut with NheI/SalI                                            |
| pAF175 | $P_{ara}$ -GST- <i>spoVD</i> AmpR    | <i>spoVD</i> amplified PY79; AFO437, 426) was digested with EcoRI/SalI then ligated to pAF172.                                        |
| pAF186 | T7-6his- <i>spoVE-gfp</i>            | <i>spoVE-gfp</i> amplified (JDB1134; AFO439,389) was digested BamHI/PstI and ligated to pETDuet-1 (Novagen) digested with BglII/PstI. |
| pAF188 | $P_{ara}$ -6his- <i>spoVE-gfp</i>    | 6his- <i>spoVE-gfp</i> fragment from pAF186 digested with XbaI/PstI ligated to pBAD33(4).                                             |
| pAF190 | $P_{ara}$ -10xhis                    | ligated oligos into pBAD24(4)                                                                                                         |
| pAF191 | $P_{ara}$ -10xHis- <i>spoVE</i> -GFP | <i>spoVE-gfp</i> amplified (PY79; AFO439, 389) was digested BamHI/PstI and ligated into pAF190 digested with BglII/PstI.              |
| pAF231 | $P_{ara}$ -GST- <i>spoVD</i>         | Fragment from digesting pAF175 with BstEII/SalI was ligated to pBAD33(4) cut with same                                                |
| pAF232 | $P_{ara}$ -GST                       | Fragment from digesting pAF172 with BstEII/PstI was ligated to pBAD33(4) cut with same                                                |
| pAF233 | $P_{ara}$ -10xhis- <i>gfp</i>        | <i>gfp</i> amplified (pKL147(5); AF)438, 439) was digested BamHI/PstI and ligated to pAF190 digested with BglII/PstI.                 |

|        |                            |                                                                                                                    |
|--------|----------------------------|--------------------------------------------------------------------------------------------------------------------|
| pAF253 | $P_{ara}$ -10his-ftsW-gfp  | ftsW-gfp amplified (JDB223; AFO423, 439) was digested with BamHI/PstI and ligated into pAF190 cut with BglII/PstI. |
| pAF256 | $P_{ara}$ -10xhis-ftsW-gfp | 10xhis-ftsW-gfp from pAF253 digested with XbaI/PstI ligated to pBAD33(4)                                           |
| pAF267 | $P_{ara}$ -GST-Pbp2B       | pbpB amplified (PY79; AFO534 538) was digested with Sall/SphI and ligated to pAF172                                |

1. **Chary, V. K., E. I. Amaya, and P. J. Piggot.** 1997. Neomycin- and spectinomycin-resistance replacement vectors for Bacillus subtilis. FEMS Microbiol Lett **153**:135-9.
2. **Guerout-Fleury, A. M., N. Frandsen, and P. Stragier.** 1996. Plasmids for ectopic integration in Bacillus subtilis. Gene **180**:57-61.
3. **Guerout-Fleury, A. M., K. Shazand, N. Frandsen, and P. Stragier.** 1995. Antibiotic-resistance cassettes for Bacillus subtilis. Gene **167**:335-6.
4. **Guzman, L. M., D. Belin, M. J. Carson, and J. Beckwith.** 1995. Tight regulation, modulation, and high-level expression by vectors containing the arabinose PBAD promoter. J Bacteriol **177**:4121-30.
5. **Lemon, K. P., and A. D. Grossman.** 1998. Localization of bacterial DNA polymerase: evidence for a factory model of replication. Science **282**:1516-9.
6. **Middleton, R., and A. Hofmeister.** 2004. New shuttle vectors for ectopic insertion of genes into Bacillus subtilis. Plasmid **51**:238-45.
7. **Panagiotidis, C. A., and S. J. Silverstein.** 1995. pALEX, a dual-tag prokaryotic expression vector for the purification of full-length proteins. Gene **164**:45-7.
8. **Real, G., A. Fay, A. Eldar, S. M. Pinto, A. O. Henriques, and J. Dworkin.** 2008. Determinants for the subcellular localization and function of a nonessential SEDS protein. J Bacteriol **190**:363-76.
