# Supplementary material
Source: PubMed Central journal article supplement (PMC2904850)
Supplement: NIHMS208926-supplement-03.pdf [file NIHMS208926-supplement-03.pdf]

AF0509 gtcggatccttattttgtcgtcgtcgtctttatagtccacaatgcggcggtgac  
AF0524 gtaggatcccgaagcgtcgcacatacctcgagtagcgg  
AF0532 ggcaactagtggtctctggctctggctcgttgcgcgctcgaatg  
AF0536 ggcggatccttattttgtcgtcgtcgtctttatagtcacggctgcctccttttc  
AF0553 ggatatcgtgctcggaggagcaacgggaactgcacaaaag  
AF0553-r cttttgtgcagttcccgttgctcctccgacacgatatcc  
AF0555 ggcaactagtggtctctggctctggctcgattcaaatgccaaaaaag  
AF0556 ggcggatccttattttgtcgtcgtcgtctttatagtcacaggatttttaactt  
AF0593 gttgattcaaagggttgagacgataatggaaaga  
AF0593-r tctttccattatcgtctcaacctttgaatcaac  
AF0701 ggattcagttaccatcatgacgcac  
AF0702 cataaactatcatatcttctcttttaattcaagccgttc  
AF0703 gaggtgtagcatgtctcaaaagaaagccgctcgttatg  
AF0704 atcccggttcatacgtgctccatac  
ojd006 ggcacggaattcgtgcttacatttgccagacg  
ojd087 ggcaagcttaaagggtggtgaactactatgagtaaaggagaagaacttttc  
ojd088 ggcggatccgctagctttgtatagttcatccatgccatg  
ojd098 ggcaactagtgaggctctggctctggctctcgcgtctcgaatgtaacgg  
ojd099 ggcaactagtgatcacatccagctaactcttg  
ojd152 ggcctcgagggttccggaatggtttcaaaaggcgaagaac  
ojd153 ggcgcatgcttacttataaagttcgtccatgccaaag  
ojd154 ggcctcgagggttccggaatgagtaaaggagaagaacttttc  
ojd155 ggcgcatgcctattttgtatagttcatccatgcc  
ojd184 ggcggtctcgagggttccggaatggtttccaagggcgagg  
ojd185 ggcggtgcatgcttattttgtacagctcatccatg  
ojd199 ggcgaattcggagcgcgaattgtctgc  
opm100 ggcaactagtgaggctctggctctggctctatgagtaaaggagaagaacttttc

|        |                                                        |
|--------|--------------------------------------------------------|
| opm101 | ggccactagtttagtatagttcatccatgccatg                     |
| JD643  | gtcgcgggatccctatattgtatagttcatccatgc                   |
| JD666  | gtcaagctttaaggaggaaaaaaaaatgagtaaaggagaagaacttttcactgg |
| JD763  | ggcgaattcggaatggatcgatcctgttac                         |
| JD764  | ggcctcgagatcggctgcctccttttcatc                         |
